# Supplementary material for: DNA Barcoding the Heliothinae (Lepidoptera: Noctuidae) of Australia and Utility of DNA Barcodes for Pest Identification in Helicoverpa and Relatives
Source: PubMed Central journal article supplement (PMC4980029; doi:10.1371/journal.pone.0160895), 2016-08-10
Supplement: pone.0160895.s001.pdf [file pone.0160895.s001.pdf]

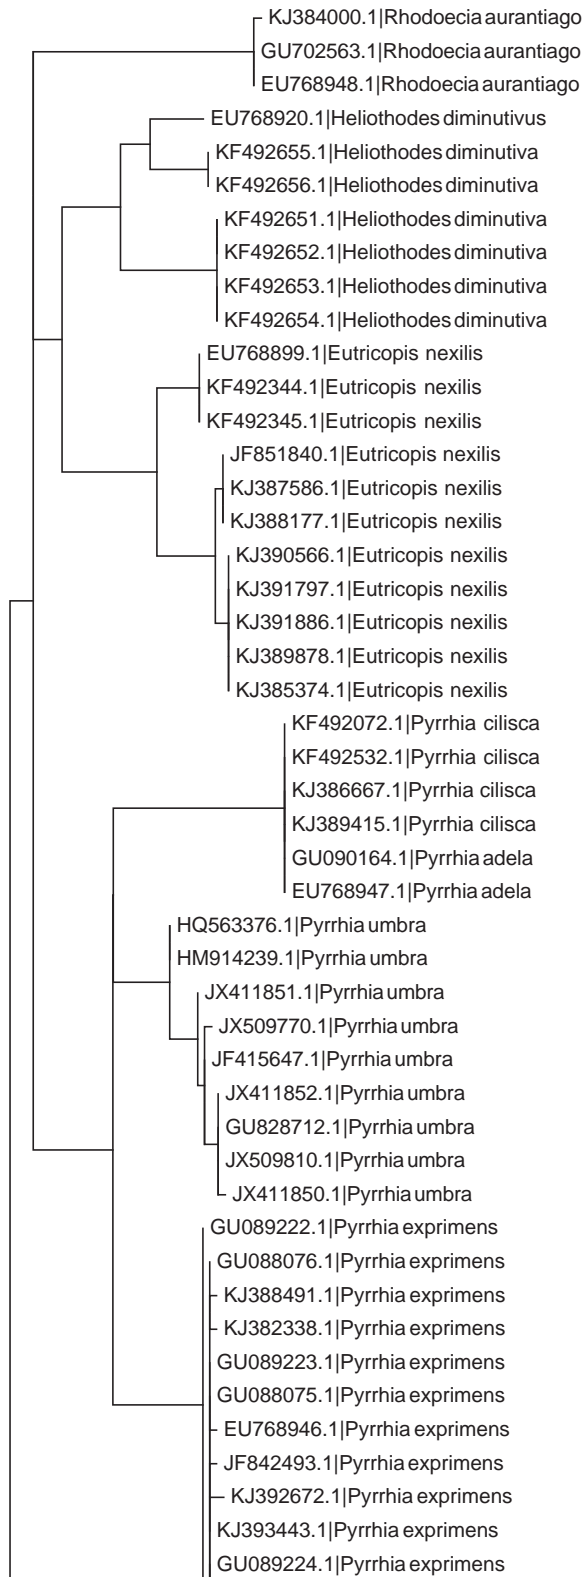

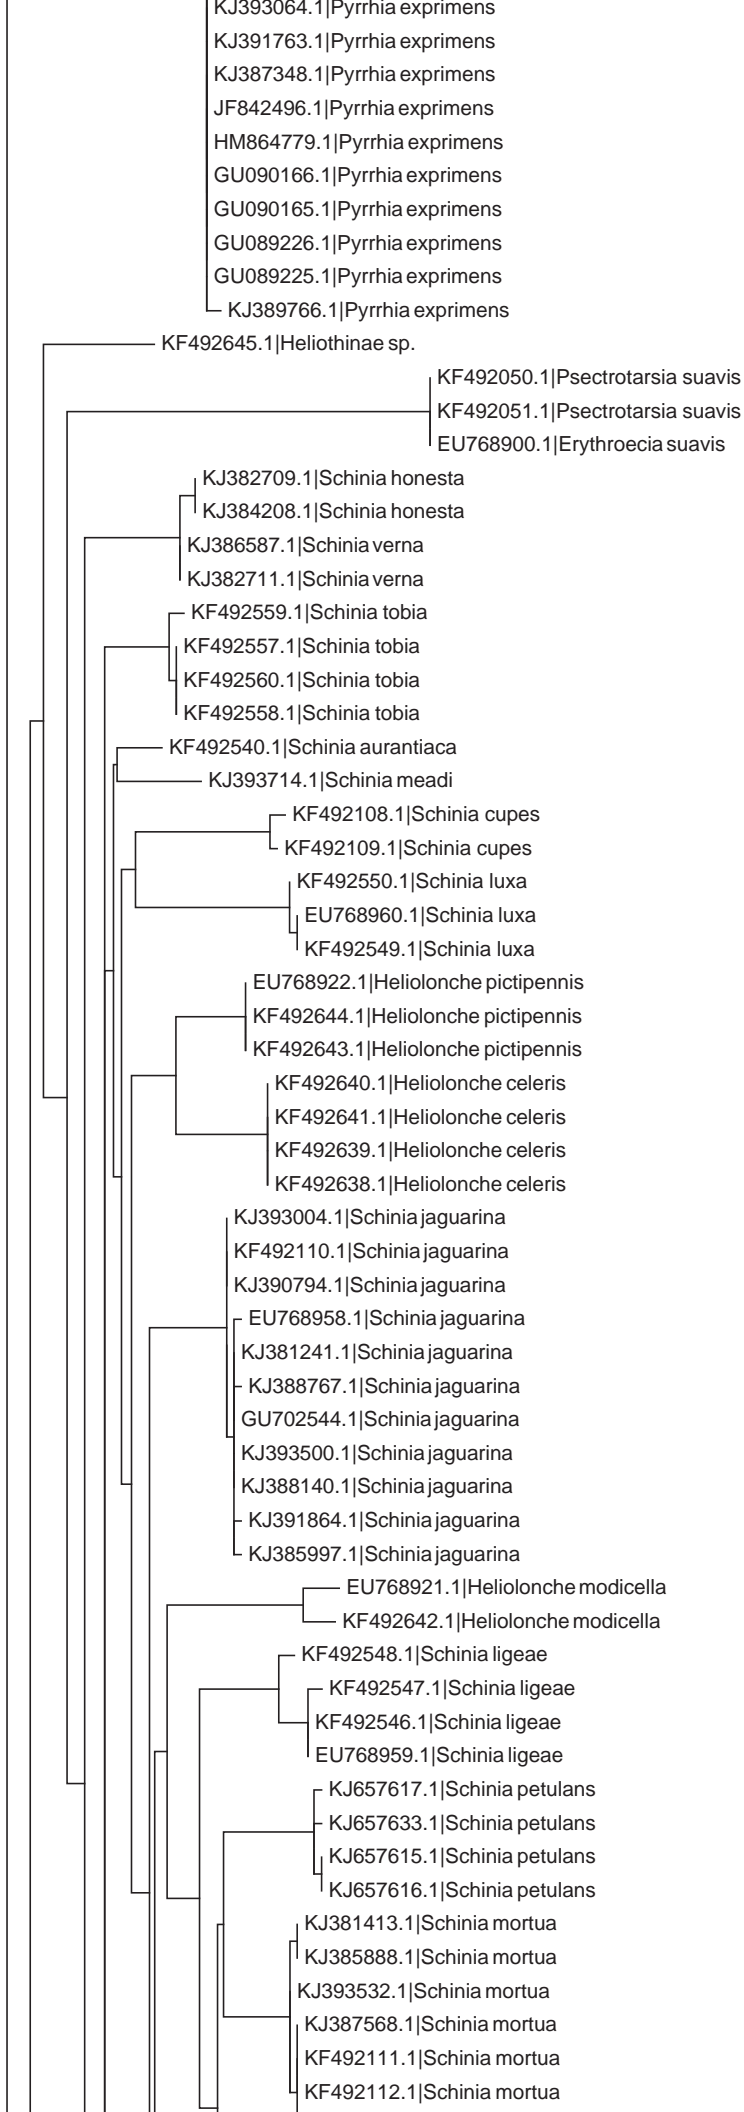

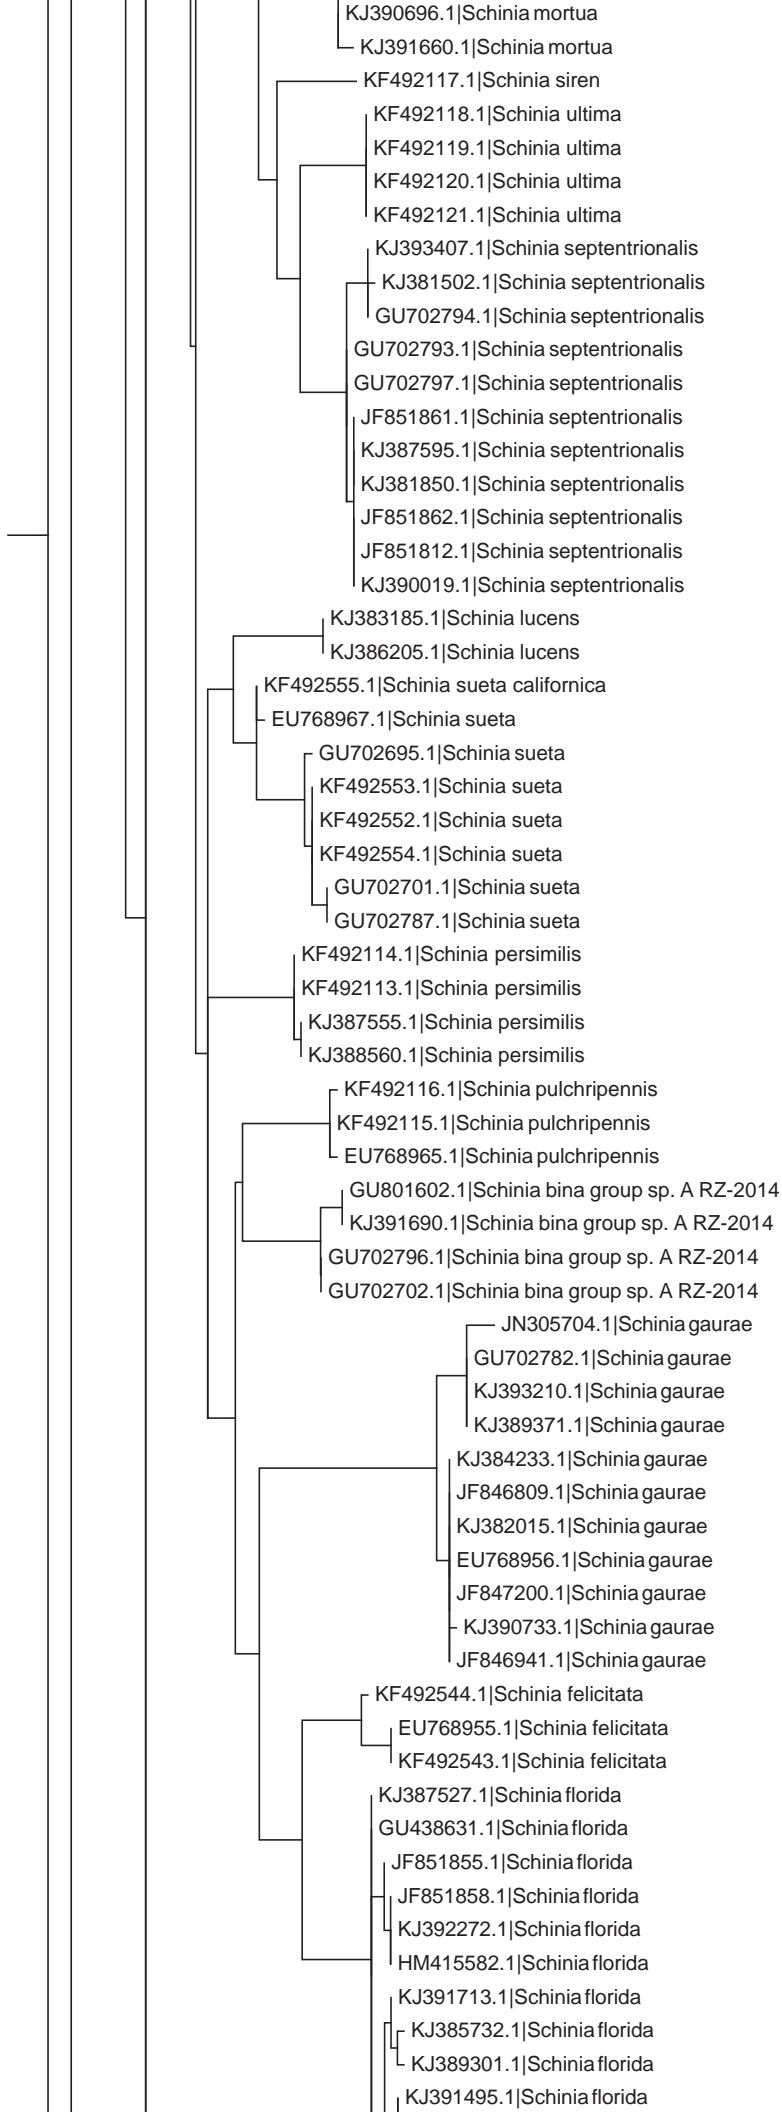

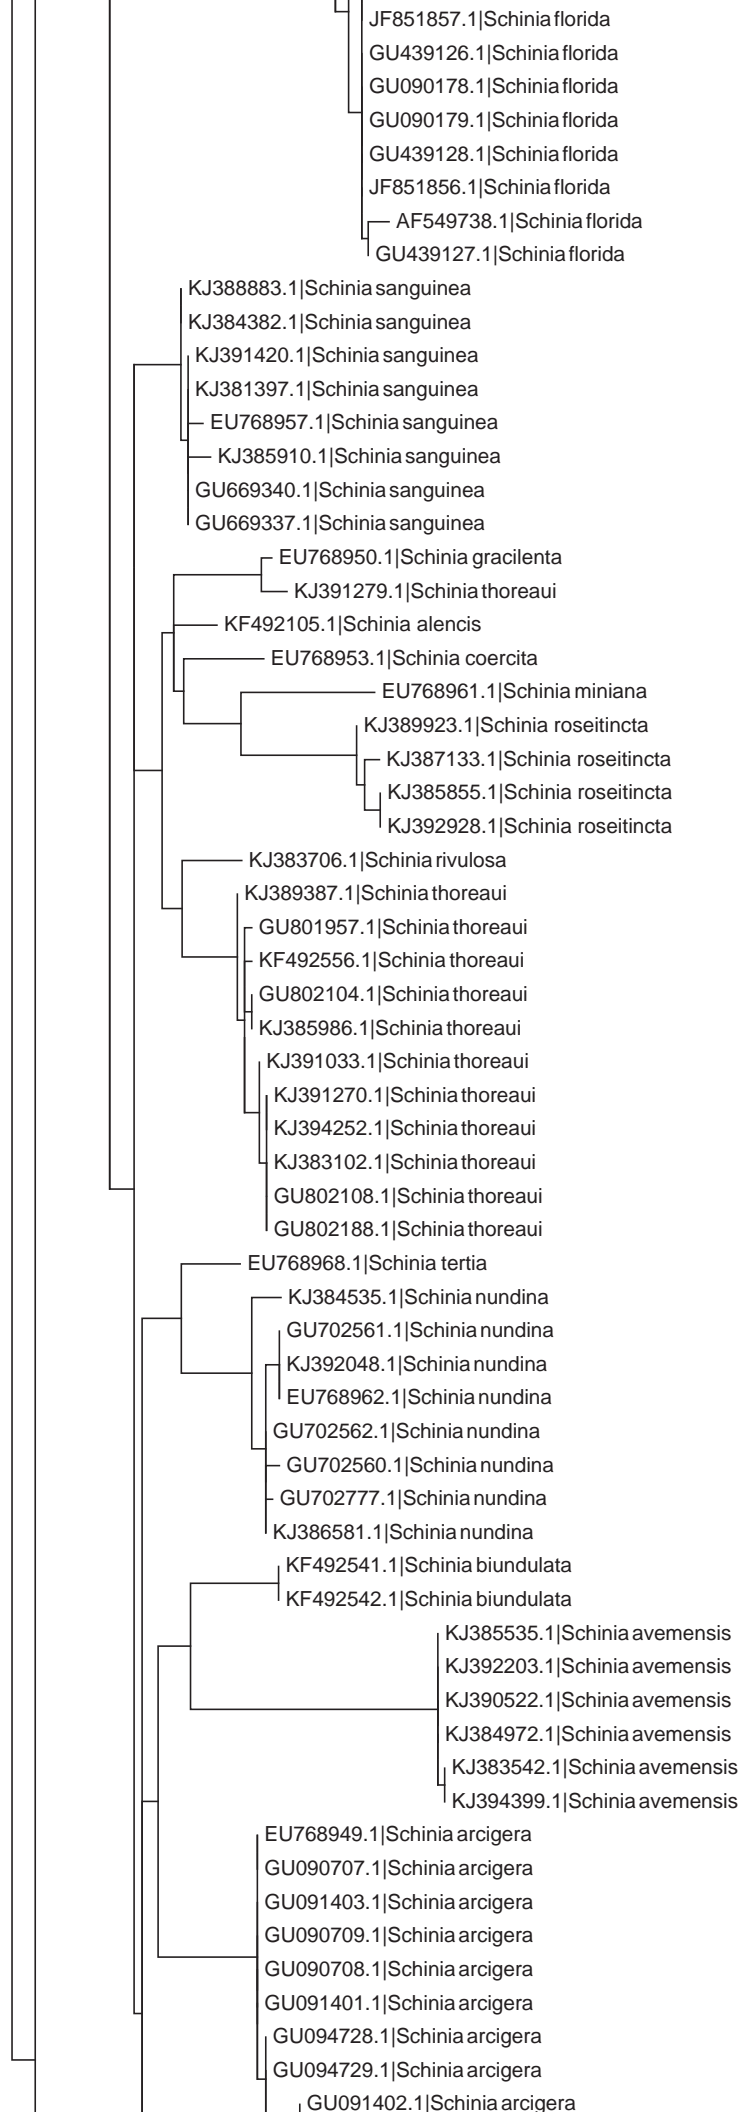

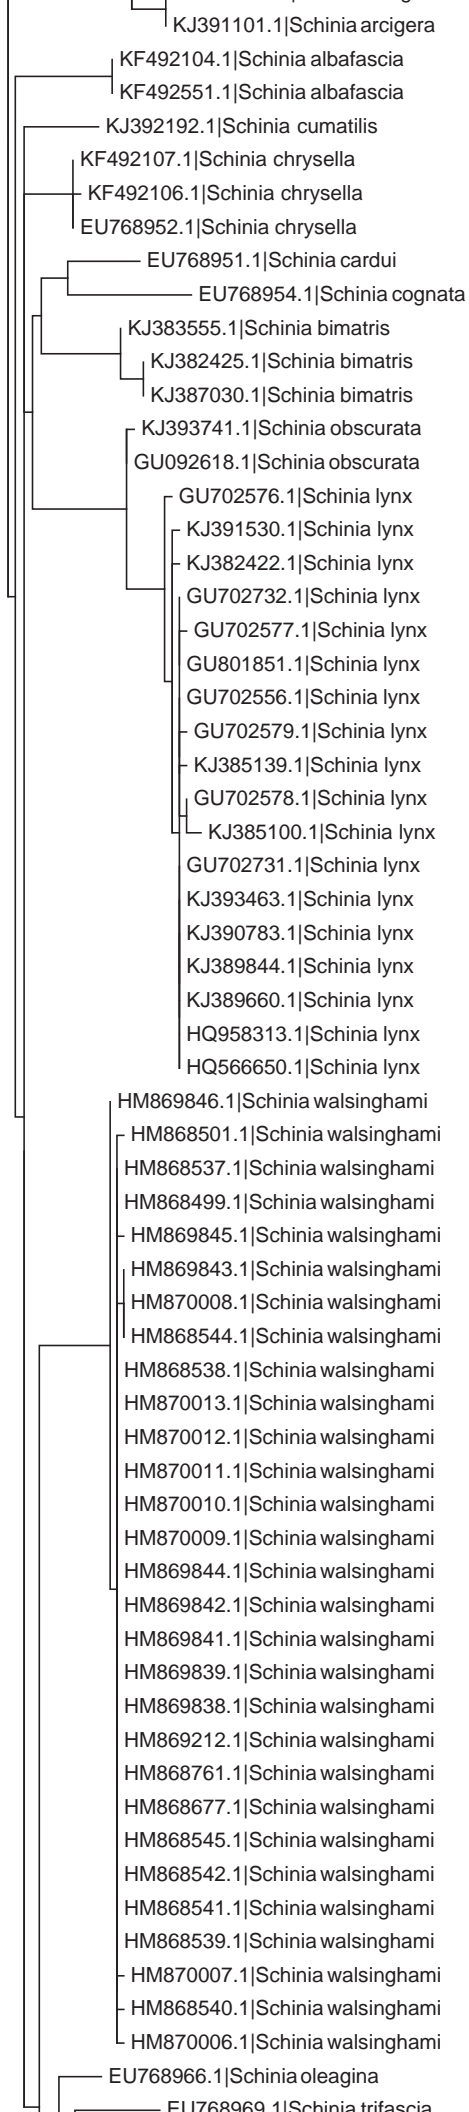

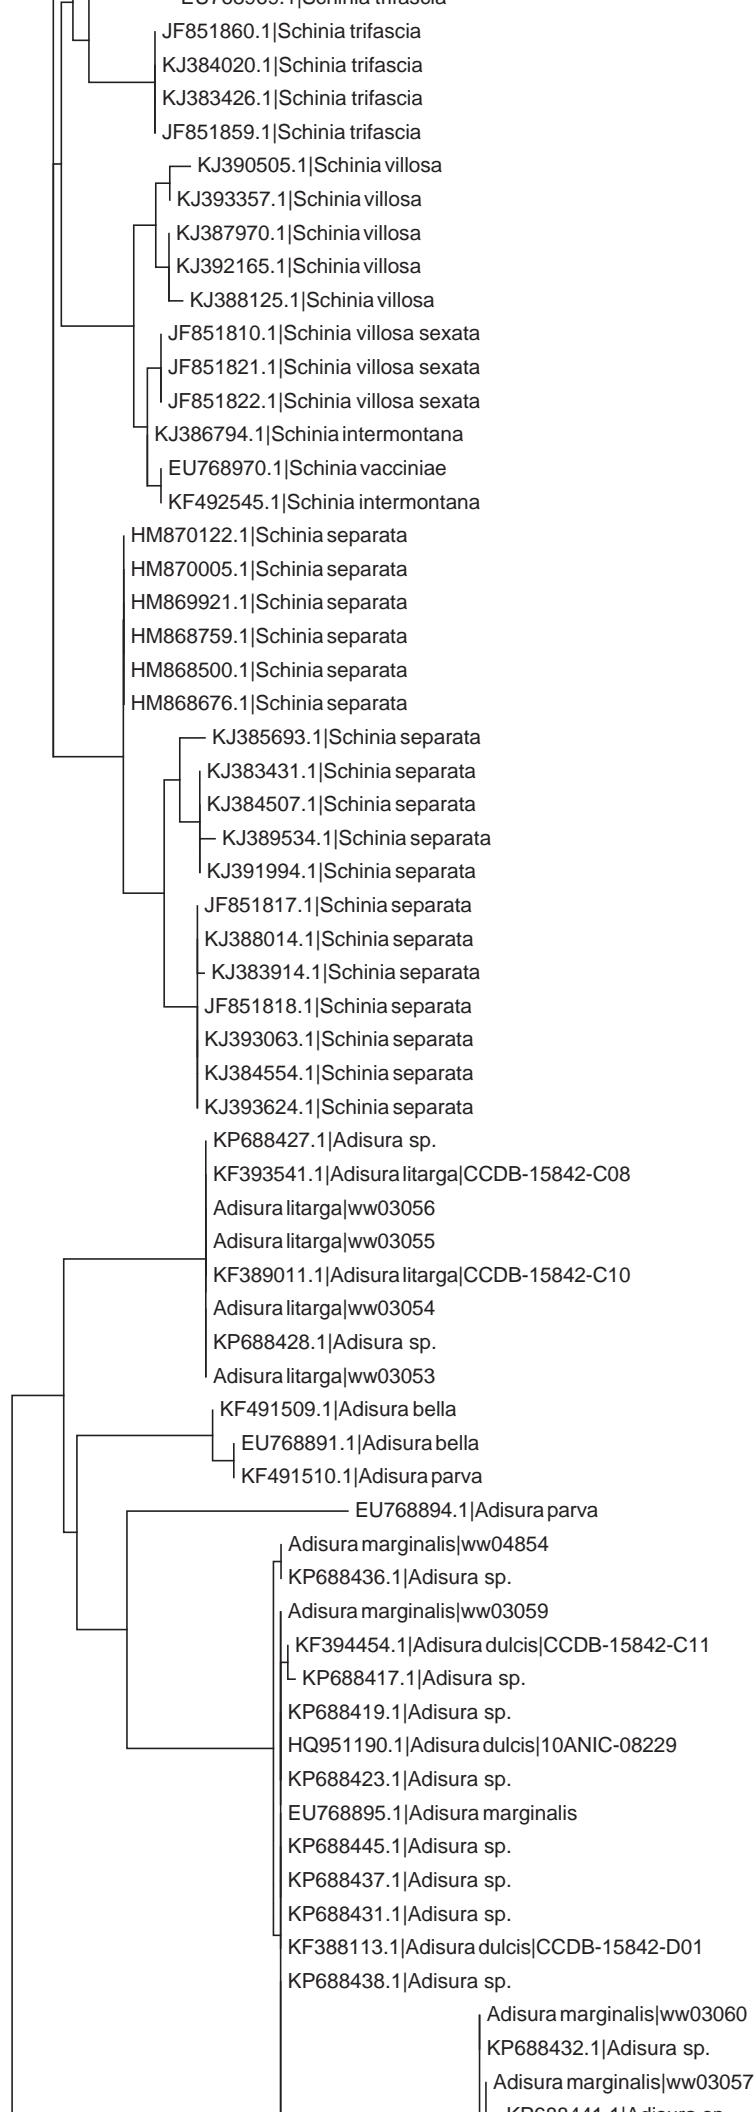

KP688441.1|Adisura sp.  
HQ951192.1|Adisura marginalis|10ANIC-08231  
HQ951191.1|Adisura marginalis|10ANIC-08230  
HQ951189.1|Adisura marginalis|10ANIC-08228  
KP688440.1|Adisura sp.  
KP688442.1|Adisura sp.  
KP688424.1|Adisura sp.  
KP688426.1|Adisura sp.  
KP688422.1|Adisura sp.  
KP688412.1|Adisura sp.  
KP688421.1|Adisura sp.  
KP688443.1|Adisura sp.  
KP688430.1|Adisura sp.  
KP688429.1|Adisura sp.  
KP688444.1|Adisura sp.  
KP688418.1|Adisura sp.  
KP688420.1|Adisura sp.  
KP688416.1|Adisura sp.  
KP688439.1|Adisura sp.  
KP688414.1|Adisura sp.  
KP688415.1|Adisura sp.  
KP688425.1|Adisura sp.  
KP688413.1|Adisura sp.  
KF389147.1|Adisura marginalis|CCDB-15842-C12  
Adisura marginalis|ww03058

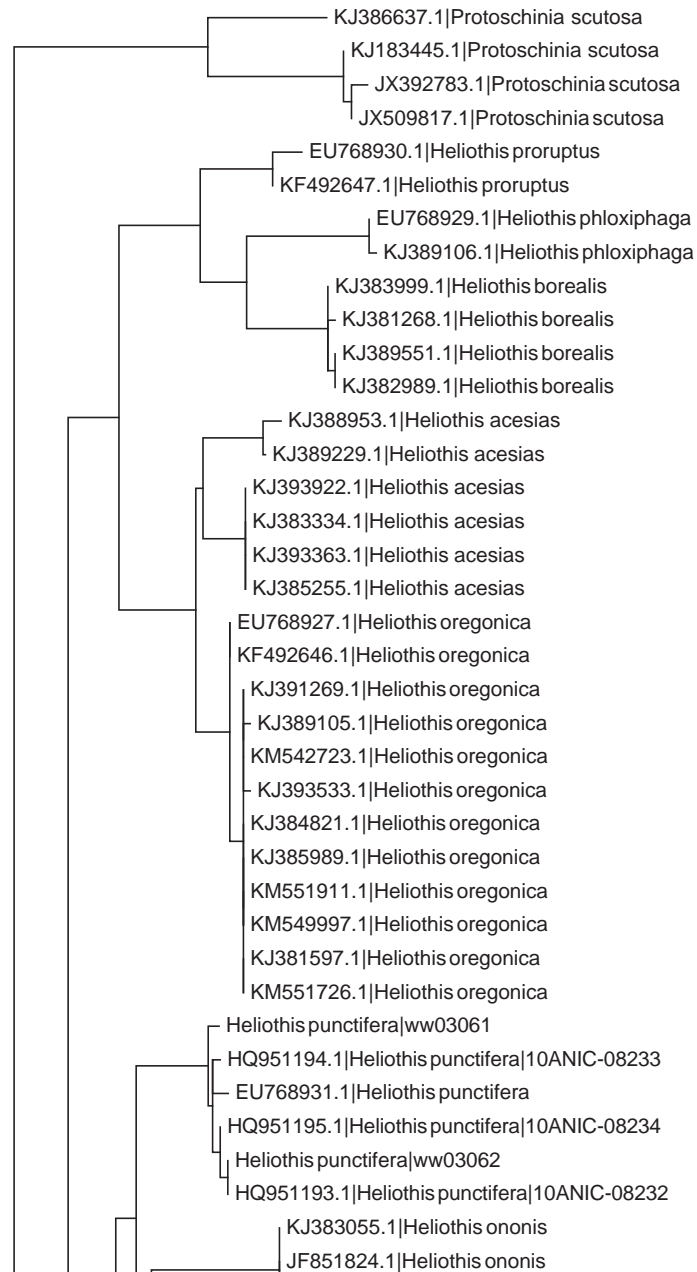

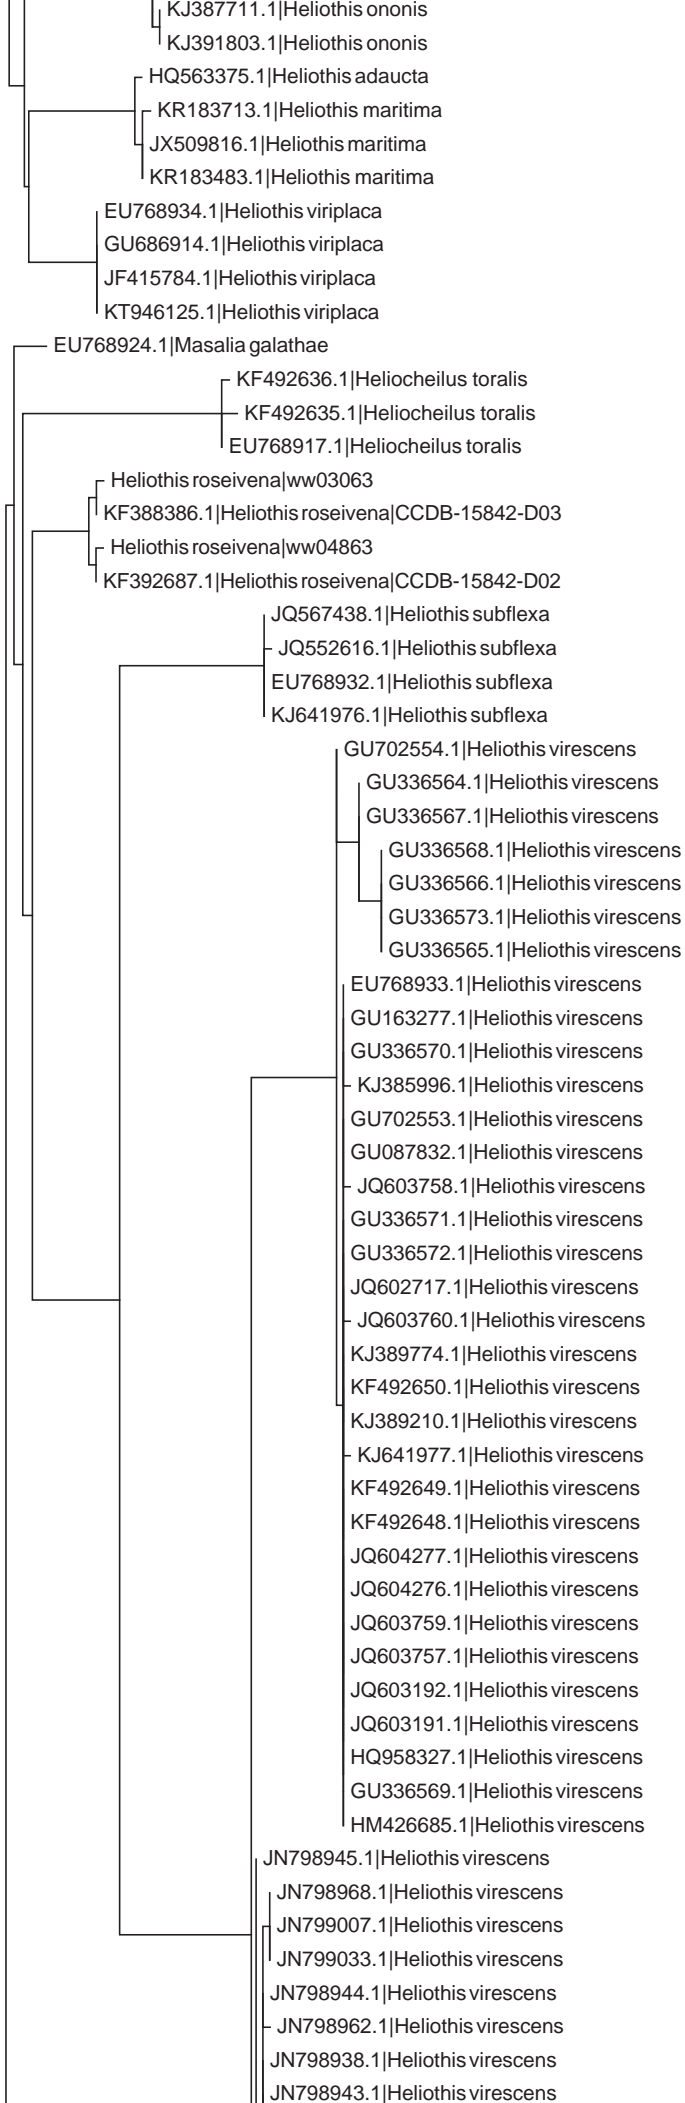



JN798946.1|Heliopsis virescens  
JN798947.1|Heliopsis virescens  
JN798948.1|Heliopsis virescens  
JN798949.1|Heliopsis virescens  
JN798950.1|Heliopsis virescens  
JN798952.1|Heliopsis virescens  
JN798953.1|Heliopsis virescens  
JN798954.1|Heliopsis virescens  
JN798957.1|Heliopsis virescens  
JN798959.1|Heliopsis virescens  
JN798960.1|Heliopsis virescens  
JN798961.1|Heliopsis virescens  
JN798963.1|Heliopsis virescens  
JN798964.1|Heliopsis virescens  
JN798965.1|Heliopsis virescens  
JN798966.1|Heliopsis virescens  
JN798967.1|Heliopsis virescens  
JN798970.1|Heliopsis virescens  
JN798971.1|Heliopsis virescens  
JN798972.1|Heliopsis virescens  
JN798973.1|Heliopsis virescens  
JN798974.1|Heliopsis virescens  
JN798975.1|Heliopsis virescens  
JN798976.1|Heliopsis virescens  
JN798977.1|Heliopsis virescens  
JN798978.1|Heliopsis virescens  
JN798979.1|Heliopsis virescens  
JN798980.1|Heliopsis virescens  
JN798981.1|Heliopsis virescens  
JN798982.1|Heliopsis virescens  
JN798983.1|Heliopsis virescens  
JN798984.1|Heliopsis virescens  
JN798985.1|Heliopsis virescens  
JN798986.1|Heliopsis virescens  
JN798987.1|Heliopsis virescens  
JN798988.1|Heliopsis virescens  
JN798989.1|Heliopsis virescens  
JN798990.1|Heliopsis virescens  
JN798991.1|Heliopsis virescens  
JN798993.1|Heliopsis virescens  
JN798994.1|Heliopsis virescens  
JN798996.1|Heliopsis virescens  
JN798997.1|Heliopsis virescens  
JN798998.1|Heliopsis virescens  
JN798999.1|Heliopsis virescens  
JN799000.1|Heliopsis virescens  
JN799001.1|Heliopsis virescens  
JN799003.1|Heliopsis virescens  
JN799004.1|Heliopsis virescens  
JN799006.1|Heliopsis virescens  
JN799008.1|Heliopsis virescens  
JN799009.1|Heliopsis virescens  
JN799010.1|Heliopsis virescens  
JN799011.1|Heliopsis virescens  
JN799012.1|Heliopsis virescens  
JN799013.1|Heliopsis virescens  
JN799014.1|Heliopsis virescens  
JN799015.1|Heliopsis virescens  
JN799016.1|Heliopsis virescens  
JN799017.1|Heliopsis virescens  
JN799018.1|Heliopsis virescens  
JN799019.1|Heliopsis virescens  
JN799021.1|Heliopsis virescens

JN799022.1|Heliiothis virescens  
JN799023.1|Heliiothis virescens  
JN799024.1|Heliiothis virescens  
JN799025.1|Heliiothis virescens  
JN799026.1|Heliiothis virescens  
JN799027.1|Heliiothis virescens  
JN799028.1|Heliiothis virescens  
JN799029.1|Heliiothis virescens  
JN799030.1|Heliiothis virescens  
JN799031.1|Heliiothis virescens  
JN799032.1|Heliiothis virescens  
JN799034.1|Heliiothis virescens  
JN799035.1|Heliiothis virescens  
JN799036.1|Heliiothis virescens  
JN799037.1|Heliiothis virescens  
JN799038.1|Heliiothis virescens  
JN799039.1|Heliiothis virescens  
JN799040.1|Heliiothis virescens  
JN799041.1|Heliiothis virescens  
JN799042.1|Heliiothis virescens  
JN799043.1|Heliiothis virescens  
JN799044.1|Heliiothis virescens  
JN799045.1|Heliiothis virescens  
JN799046.1|Heliiothis virescens  
JN799047.1|Heliiothis virescens  
JN799048.1|Heliiothis virescens  
JN799049.1|Heliiothis virescens  
JN799050.1|Heliiothis virescens  
JN798940.1|Heliiothis virescens  
JN798937.1|Heliiothis virescens  
JN799002.1|Heliiothis virescens  
JN798939.1|Heliiothis virescens  
JN798941.1|Heliiothis virescens  
JN798942.1|Heliiothis virescens  
JN799005.1|Heliiothis virescens  
JN799020.1|Heliiothis virescens  
JN798995.1|Heliiothis virescens  
JN798992.1|Heliiothis virescens  
JN798969.1|Heliiothis virescens  
JN798958.1|Heliiothis virescens  
JN798956.1|Heliiothis virescens  
JN798951.1|Heliiothis virescens  
JN798955.1|Heliiothis virescens

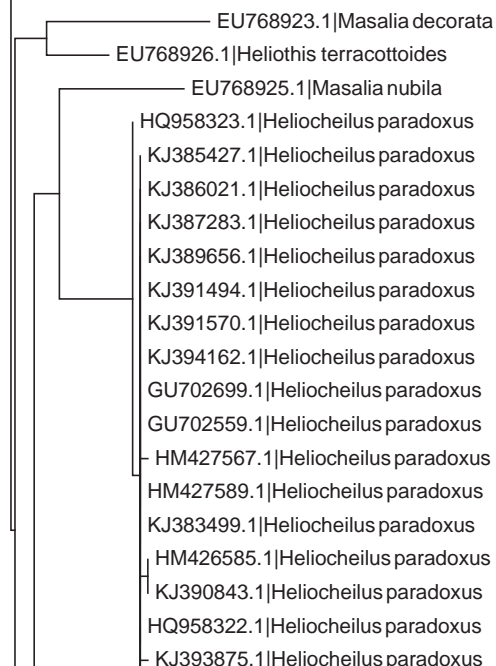

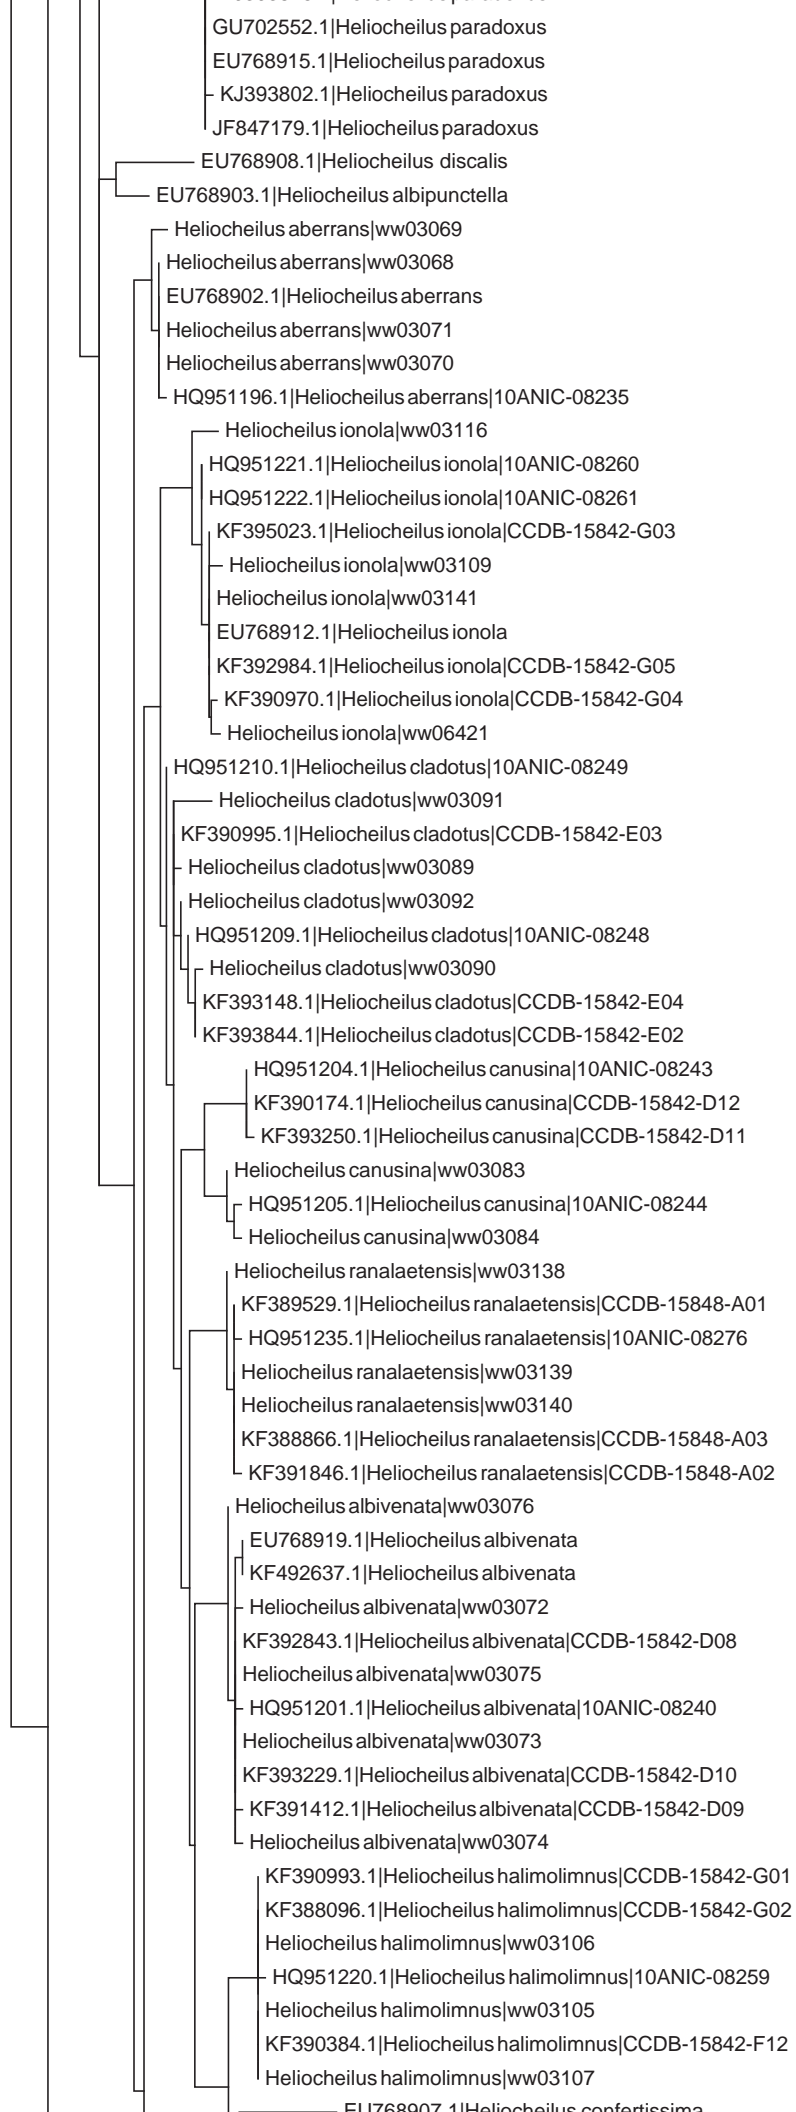

LC070307.1|Heliocheilus cornutus  
HQ951233.1|Heliocheilus pallida|10ANIC-08272  
Heliocheilus aleurota|ww03078  
HQ951197.1|Heliocheilus aleurota|10ANIC-08236  
HQ951198.1|Heliocheilus aleurota|10ANIC-08237  
HQ951199.1|Heliocheilus aleurota|10ANIC-08238  
HQ951200.1|Heliocheilus aleurota|10ANIC-08239  
KF391599.1|Heliocheilus pallida|10ANIC-08274  
EU768914.1|Heliocheilus sp.-SC-2008  
Heliocheilus aleurota|ww03077  
Heliocheilus aleurota|ww03079  
KF390683.1|Heliocheilus pallida|10ANIC-08273  
Heliocheilus melibaphes|ww03117  
HQ949783.1|Heliocheilus melibaphes|10ANIC-06513  
Heliocheilus melibaphes|ww03119  
HQ951224.1|Heliocheilus melibaphes|10ANIC-08263  
HQ951223.1|Heliocheilus melibaphes|10ANIC-08262  
EU768913.1|Heliocheilus melibaphes  
Heliocheilus melibaphes|ww03118  
Heliocheilus pallida|ww03134  
KF391592.1|Heliocheilus pallida|CCDB-15842-H07  
KF391528.1|Heliocheilus pallida|CCDB-15842-H08  
EU768916.1|Heliocheilus nr.pallida-SC2008  
Heliocheilus pallida|ww03132  
KF394822.1|Heliocheilus pallida|CCDB-15842-H06  
Heliocheilus pallida|ww03133  
HQ951230.1|Heliocheilus neurota|10ANIC-08269  
KF391991.1|Heliocheilus neurota|CCDB-15842-H01  
EU768906.1|Heliocheilus neurota  
HQ951231.1|Heliocheilus neurota|10ANIC-08270  
HQ951232.1|Heliocheilus neurota|10ANIC-08271  
KF388368.1|Heliocheilus neurota|CCDB-15842-H03  
Heliocheilus neurota|ww03128  
KF387839.1|Heliocheilus neurota|CCDB-15842-H04  
Heliocheilus neurota|ww03129  
Heliocheilus neurota|ww03130  
Heliocheilus neurota|ww03131  
KF389750.1|Heliocheilus neurota|CCDB-15842-G12  
KF393512.1|Heliocheilus neurota|CCDB-15842-H05  
KF388089.1|Heliocheilus neurota|CCDB-15842-H02  
HQ951229.1|Heliocheilus neurota|10ANIC-08268  
EU768910.1|Heliocheilus ferruginosa  
Heliocheilus ferruginosa-thelycritus|ww03104  
Heliocheilus ferruginosa|ww03111  
Heliocheilus ferruginosa|ww03110  
HQ951217.1|Heliocheilus ferruginosa|10ANIC-08256  
Heliocheilus ferruginosa-thelycritus|ww03101  
Heliocheilus ferruginosa|ww03112  
HQ951216.1|Heliocheilus ferruginosa|10ANIC-08255  
Heliocheilus ferruginosa-thelycritus|ww03103  
HQ951215.1|Heliocheilus ferruginosa|10ANIC-08254  
Heliocheilus ferruginosa-thelycritus|ww03102  
Heliocheilus eodora|ww03099  
KF388200.1|Heliocheilus eodora|CCDB-15842-F08  
KF393652.1|Heliocheilus vulpinotatus|CCDB-15848-A10  
Heliocheilus vulpinotatus|ww04868  
Heliocheilus vulpinotatus|ww03146  
KF395177.1|Heliocheilus eodora|CCDB-15842-F05  
KF390727.1|Heliocheilus eodora|CCDB-15842-F06  
KF389590.1|Heliocheilus eodora|CCDB-15842-F07  
HQ951214.1|Heliocheilus eodora|10ANIC-08253  
HQ951213.1|Heliocheilus eodora|10ANIC-08252  
Heliocheilus eodora|ww03100

Heliocheilus eodora|ww03098  
EU768909.1|Heliocheilus eodora  
Heliocheilus eodora|ww03097  
KF394478.1|Heliocheilus vulpinotatus|CCDB-15848-A08  
KF394423.1|Heliocheilus vulpinotatus|CCDB-15848-A09  
- HQ951203.1|Heliocheilus atrilinea|10ANIC-08242  
- HQ951202.1|Heliocheilus atrilinea|10ANIC-08241  
- Heliocheilus atrilinea|ww03082  
- Heliocheilus atrilinea|ww03080  
Heliocheilus flavitincta|ww03114  
- Heliocheilus atrilinea|ww03081  
Heliocheilus flavitincta|ww03115  
KF395172.1|Heliocheilus flavitincta|CCDB-15842-F11  
KF394793.1|Heliocheilus canusina|CCDB-15842-E01  
KF393080.1|Heliocheilus flavitincta|CCDB-15842-F10  
KF392225.1|Heliocheilus flavitincta|CCDB-15842-F09  
HQ951219.1|Heliocheilus flavitincta|10ANIC-08258  
HQ951218.1|Heliocheilus flavitincta|10ANIC-08257  
Heliocheilus abaccheutus|ww03065  
- Heliocheilus rhodopolia|ww03142  
- Heliocheilus rhodopolia|ww04865  
- Heliocheilus rhodopolia|ww04866  
EU768904.1|Heliocheilus aleurota  
Heliocheilus abaccheutus|ww03066  
KF392754.1|Heliocheilus abaccheutus|CCDB-15842-D07  
KF392591.1|Heliocheilus abaccheutus|CCDB-15842-D06  
KF392076.1|Heliocheilus abaccheutus|CCDB-15842-D05  
- Heliocheilus abaccheutus|ww03067  
Heliocheilus mesoleuca|ww03123  
Heliocheilus thelycritus|ww03144  
Heliocheilus mesoleuca|ww03120  
Heliocheilus flavitincta|ww06422  
- KF389958.1|Heliocheilus mesoleuca|CCDB-15842-G08  
Heliocheilus thelycritus|ww03145  
EU768905.1|Heliocheilus cistella  
HQ951225.1|Heliocheilus mesoleuca|10ANIC-08264  
HQ951226.1|Heliocheilus mesoleuca|10ANIC-08265  
KF390233.1|Heliocheilus thelycritus|CCDB-15848-A06  
Heliocheilus cistella|ww03088  
- KF391794.1|Heliocheilus cramboides|CCDB-15842-E12  
Heliocheilus cistella|ww03087  
KF393118.1|Heliocheilus cramboides|CCDB-15842-E11  
KF392324.1|Heliocheilus mesoleuca|CCDB-15842-G06  
KF389663.1|Heliocheilus cramboides|CCDB-15842-F03  
- Heliocheilus mesoleuca|ww03121  
KF388627.1|Heliocheilus thelycritus|CCDB-15848-A07  
KF388396.1|Heliocheilus thelycritus|CCDB-15848-A05  
HQ951236.1|Heliocheilus thelycritus|10ANIC-08277  
HQ951207.1|Heliocheilus cistella|10ANIC-08246  
Heliocheilus cistella|ww03086  
- KF389760.1|Heliocheilus mesoleuca|CCDB-15842-G07  
HQ951206.1|Heliocheilus cistella|10ANIC-08245  
- HQ951227.1|Heliocheilus moribunda|10ANIC-08266  
- Heliocheilus moribunda|ww03126  
- KF392583.1|Heliocheilus moribunda|CCDB-15842-G10  
EU768911.1|Heliocheilus flavitincta  
- Heliocheilus flavitincta|ww06423  
- Heliocheilus flavitincta|ww03113  
- Heliocheilus moribunda|ww03124  
KF388301.1|Heliocheilus cramboides|CCDB-15842-F04  
Heliocheilus cramboides|ww03095  
HQ951228.1|Heliocheilus moribunda|10ANIC-08267  
Heliocheilus moribunda|ww03127

KF388348.1|*Heliocheilus moribunda*|CCDB-15842-G11  
|*Heliocheilus moribunda*|ww03125  
|KF392045.1|*Heliocheilus moribunda*|CCDB-15842-G09  
|EU768918.1|*Heliocheilus nr. cramboides*-SC-2008  
|*Heliocheilus cramboides*|ww03093  
|*Heliocheilus cramboides*|ww04870  
|KF391014.1|*Heliocheilus confundens*|CCDB-15842-E09  
|*Heliocheilus cramboides*|ww03094  
|*Heliocheilus cramboides*|ww04872  
|KF392342.1|*Heliocheilus cramboides*|CCDB-15842-E10  
|KF394411.1|*Heliocheilus* sp. ("confundens")|CCDB-15842-E06  
|KF394245.1|*Heliocheilus puncticulata*|CCDB-15842-H10  
|KF393845.1|*Heliocheilus cramboides*|CCDB-15842-F01  
|KF393401.1|*Heliocheilus* sp. ("confundens")|CCDB-15842-E07  
|KF390201.1|*Heliocheilus* sp. ("confundens")|CCDB-15842-E08  
|KF390295.1|*Heliocheilus cramboides*|CCDB-15842-F02  
|KF387994.1|*Heliocheilus puncticulata*|CCDB-15842-H11  
|HQ951234.1|*Heliocheilus puncticulata*|10ANIC-08275  
|HQ951212.1|*Heliocheilus cramboides*|10ANIC-08251  
|HQ951211.1|*Heliocheilus cramboides*|10ANIC-08250  
|*Heliocheilus thelycritus*|ww03143  
|*Heliocheilus puncticulata*|ww03137  
|*Heliocheilus puncticulata*|ww03136  
|*Heliocheilus cramboides*|ww04869  
|*Heliocheilus cramboides*|ww03096  
|*Heliocheilus cramboides*|ww04873  
|*Heliocheilus puncticulata*|ww04867  
|— *Heliocheilus mesoleuca*|ww03122  
|*Heliocheilus puncticulata*|ww03135  
|KF389158.1|*Heliocheilus* sp. ("confundens")|CCDB-15842-E05  
|KF388211.1|*Heliocheilus puncticulata*|CCDB-15842-H09  
|— KM573143.1|*Heliothis nubigera*  
|— KT946054.1|*Heliothis peltigera*  
|— GU707406.1|*Heliothis peltigera*  
|— KT946126.1|*Heliothis peltigera*  
|— HM914238.1|*Heliothis peltigera*  
|— KT946127.1|*Heliothis peltigera*  
|— JF415783.1|*Heliothis peltigera*  
|— KM572408.1|*Heliothis peltigera*  
|— JN988531.1|*Heliothis peltigera*  
|— EU768928.1|*Heliothis peltigera*

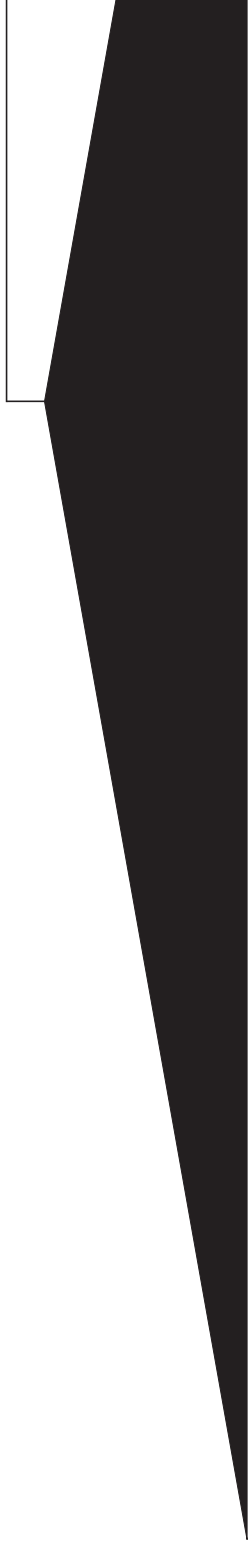

Australothis & Helicoverpa

0.05
