# Supplementary material for: DNA Barcoding the Heliothinae (Lepidoptera: Noctuidae) of Australia and Utility of DNA Barcodes for Pest Identification in Helicoverpa and Relatives
Source: PubMed Central journal article supplement (PMC4980029; doi:10.1371/journal.pone.0160895), 2016-08-10
Supplement: pone.0160895.s002.pdf [file pone.0160895.s002.pdf]

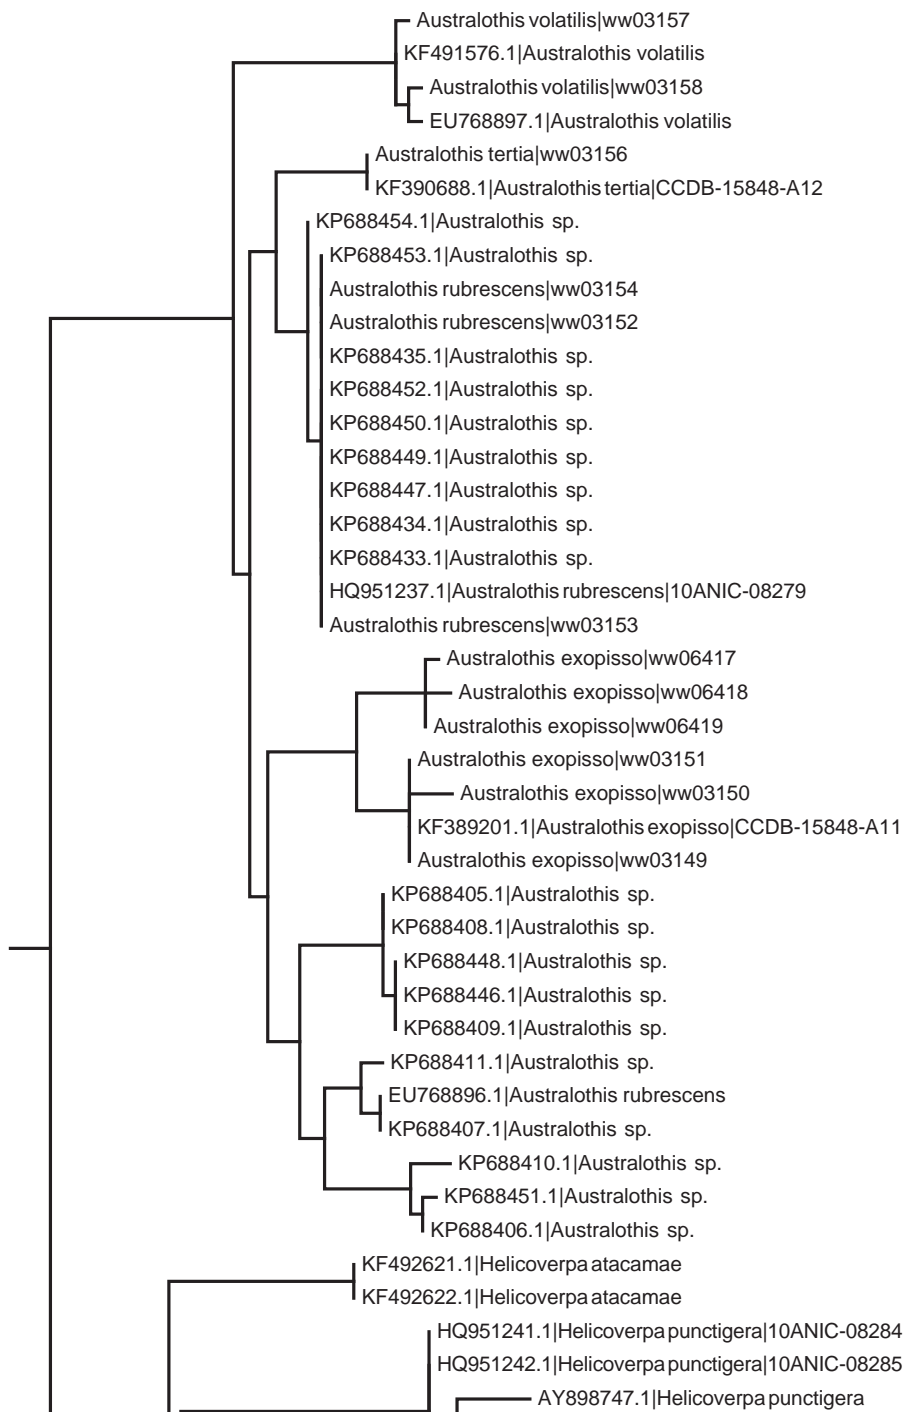

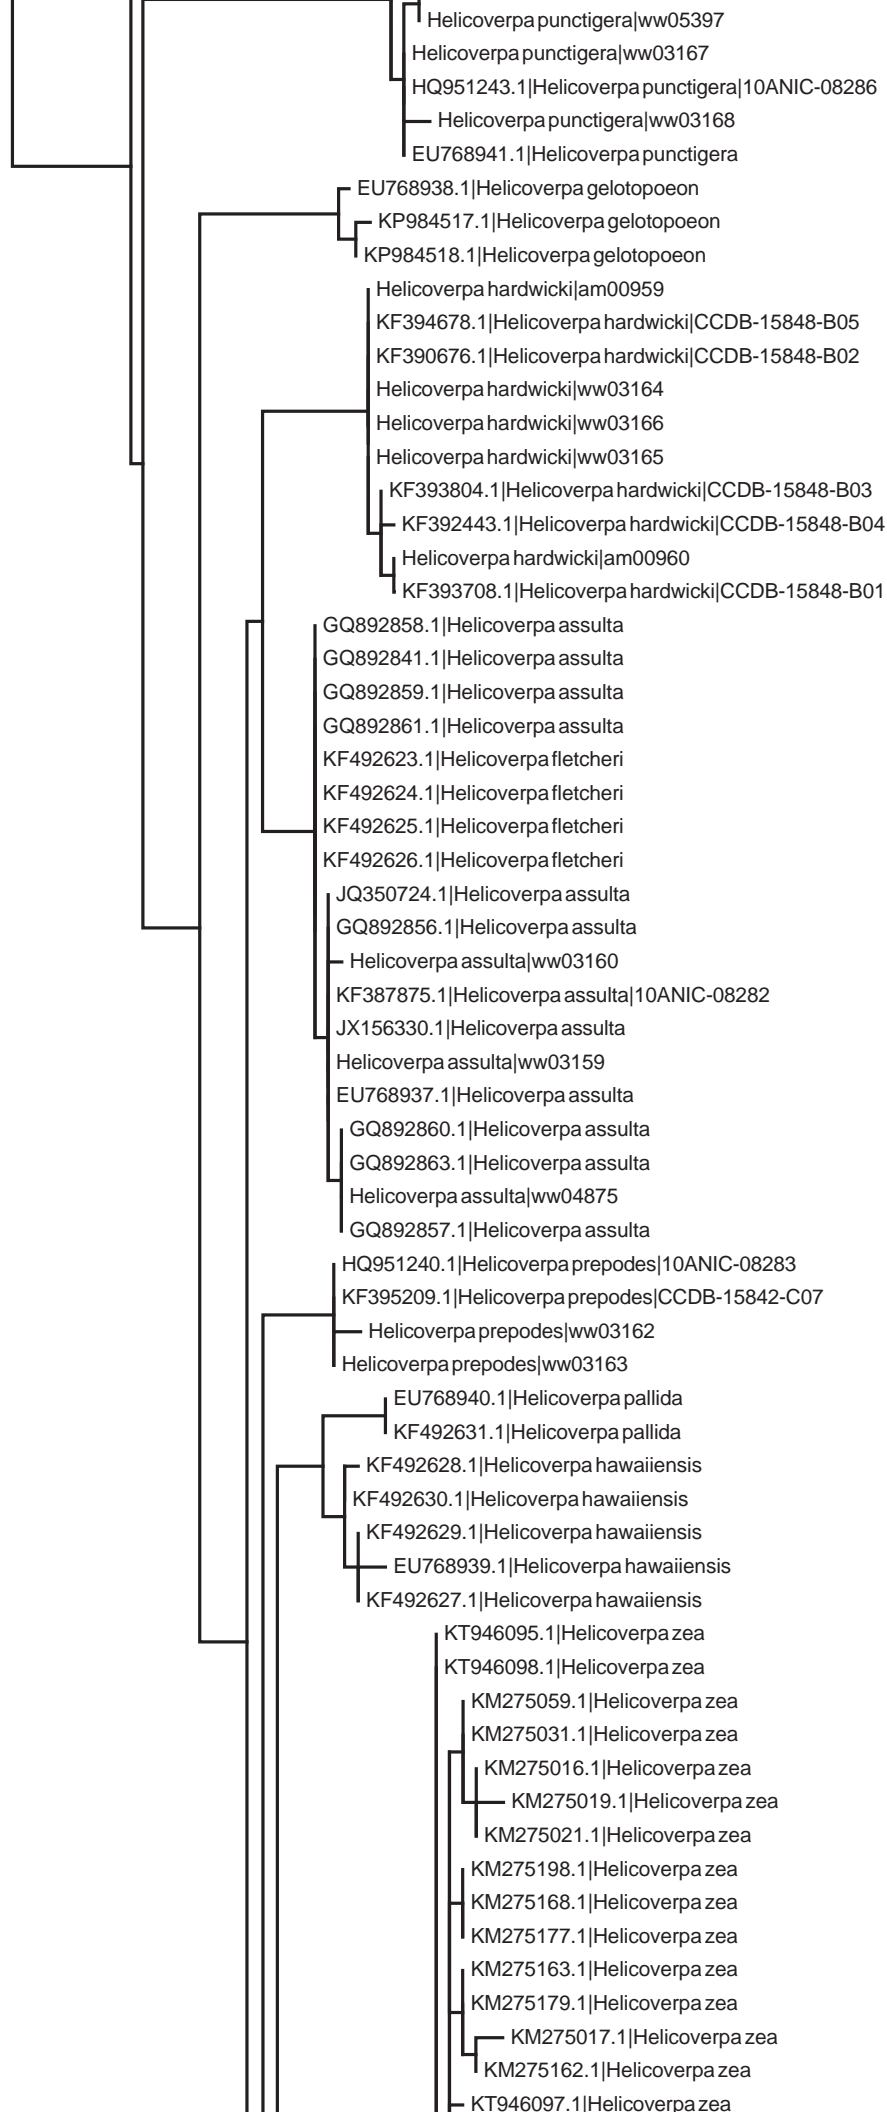

KM275120.1|Helicoverpa zea  
GU438926.1|Helicoverpa zea  
KF624880.1|Helicoverpa zea  
KM275159.1|Helicoverpa zea  
KM275160.1|Helicoverpa zea  
KM275146.1|Helicoverpa zea  
KM275161.1|Helicoverpa zea  
KM275145.1|Helicoverpa zea  
KM275058.1|Helicoverpa zea  
JX156329.1|Helicoverpa zea  
JX156328.1|Helicoverpa zea  
FN907971.1|Helicoverpa zea  
FN907972.1|Helicoverpa zea  
KM275093.1|Helicoverpa zea  
FN907970.1|Helicoverpa zea  
KM275057.1|Helicoverpa zea  
GU094579.1|Helicoverpa zea  
KJ641975.1|Helicoverpa zea  
KM275008.1|Helicoverpa zea  
KM275166.1|Helicoverpa zea  
KT946111.1|Helicoverpa zea  
KM275029.1|Helicoverpa zea  
KP984520.1|Helicoverpa zea  
KM275037.1|Helicoverpa zea  
KM274998.1|Helicoverpa zea  
KT946113.1|Helicoverpa zea  
KT946110.1|Helicoverpa zea  
KT946109.1|Helicoverpa zea  
KT946108.1|Helicoverpa zea  
KT946107.1|Helicoverpa zea  
KT946104.1|Helicoverpa zea  
KT946103.1|Helicoverpa zea  
KT946102.1|Helicoverpa zea  
KT946101.1|Helicoverpa zea  
KT946100.1|Helicoverpa zea  
KT946099.1|Helicoverpa zea  
KT946096.1|Helicoverpa zea  
KT946094.1|Helicoverpa zea  
KT946093.1|Helicoverpa zea  
KT946092.1|Helicoverpa zea  
KT946091.1|Helicoverpa zea  
KT946090.1|Helicoverpa zea  
KT946089.1|Helicoverpa zea  
KT946087.1|Helicoverpa zea  
KT946086.1|Helicoverpa zea  
KT946085.1|Helicoverpa zea  
KT946084.1|Helicoverpa zea  
KT946083.1|Helicoverpa zea  
KT946082.1|Helicoverpa zea  
KT946081.1|Helicoverpa zea  
KT946045.1|Helicoverpa zea  
KT946044.1|Helicoverpa zea  
KT946043.1|Helicoverpa zea  
KT946042.1|Helicoverpa zea  
KT946041.1|Helicoverpa zea  
KF624879.1|Helicoverpa zea  
KM275023.1|Helicoverpa zea  
KM275194.1|Helicoverpa zea  
KM275195.1|Helicoverpa zea  
KF624878.1|Helicoverpa zea  
KF492634.1|Helicoverpa zea  
KF492633.1|Helicoverpa zea  
KF492632.1|Helicoverpa zea

KM42692.1|Helicoverpa zea  
JQ578528.1|Helicoverpa zea  
JQ577648.1|Helicoverpa zea  
HQ571107.1|Helicoverpa zea  
HQ571030.1|Helicoverpa zea  
GU090471.1|Helicoverpa zea  
GU090470.1|Helicoverpa zea  
GU087831.1|Helicoverpa zea  
EU768942.1|Helicoverpa zea  
KM274954.1|Helicoverpa zea  
KM274942.1|Helicoverpa zea  
KM275170.1|Helicoverpa zea  
KP984521.1|Helicoverpa zea  
KM274978.1|Helicoverpa zea  
JF854710.1|Helicoverpa zea  
GU438925.1|Helicoverpa zea  
KT946112.1|Helicoverpa zea  
KT946106.1|Helicoverpa zea  
KT946088.1|Helicoverpa zea  
KT946105.1|Helicoverpa zea  
KM275006.1|Helicoverpa zea  
KM275005.1|Helicoverpa zea  
KM275004.1|Helicoverpa zea  
KM275003.1|Helicoverpa zea  
KM275002.1|Helicoverpa zea  
KM275001.1|Helicoverpa zea  
KM275000.1|Helicoverpa zea  
KM274999.1|Helicoverpa zea  
KM274997.1|Helicoverpa zea  
KM274977.1|Helicoverpa zea  
KM274976.1|Helicoverpa zea  
KM274956.1|Helicoverpa zea  
GU163276.1|Helicoverpa zea  
KP984519.1|Helicoverpa zea  
KM274955.1|Helicoverpa zea  
KM275209.1|Helicoverpa zea  
KM275208.1|Helicoverpa zea  
KM275207.1|Helicoverpa zea  
KM275201.1|Helicoverpa zea  
KM275200.1|Helicoverpa zea  
KM275199.1|Helicoverpa zea  
KM275197.1|Helicoverpa zea  
KM275196.1|Helicoverpa zea  
KM275193.1|Helicoverpa zea  
KM275192.1|Helicoverpa zea  
KM275191.1|Helicoverpa zea  
KM275190.1|Helicoverpa zea  
KM275189.1|Helicoverpa zea  
KM275188.1|Helicoverpa zea  
KM275187.1|Helicoverpa zea  
KM275186.1|Helicoverpa zea  
KM275185.1|Helicoverpa zea  
KM275184.1|Helicoverpa zea  
KM275183.1|Helicoverpa zea  
KM275182.1|Helicoverpa zea  
KM275181.1|Helicoverpa zea  
KM275180.1|Helicoverpa zea  
KM275178.1|Helicoverpa zea  
KM275176.1|Helicoverpa zea  
KM275175.1|Helicoverpa zea  
KM275174.1|Helicoverpa zea  
KM275173.1|Helicoverpa zea  
KM275172.1|Helicoverpa zea  
KM275171.1|Helicoverpa zea

KM275171.1|Helicoverpa zea  
KM275169.1|Helicoverpa zea  
KM275167.1|Helicoverpa zea  
KM275165.1|Helicoverpa zea  
KM275164.1|Helicoverpa zea  
KM275144.1|Helicoverpa zea  
KM275143.1|Helicoverpa zea  
KM275142.1|Helicoverpa zea  
KM275141.1|Helicoverpa zea  
KM275126.1|Helicoverpa zea  
KM275125.1|Helicoverpa zea  
KM275124.1|Helicoverpa zea  
KM275123.1|Helicoverpa zea  
KM275122.1|Helicoverpa zea  
KM275121.1|Helicoverpa zea  
KM275119.1|Helicoverpa zea  
KM275118.1|Helicoverpa zea  
KM275117.1|Helicoverpa zea  
KM275116.1|Helicoverpa zea  
KM275115.1|Helicoverpa zea  
KM275114.1|Helicoverpa zea  
KM275113.1|Helicoverpa zea  
KM275096.1|Helicoverpa zea  
KM275095.1|Helicoverpa zea  
KM275094.1|Helicoverpa zea  
KM275069.1|Helicoverpa zea  
KM275068.1|Helicoverpa zea  
KM275067.1|Helicoverpa zea  
KM275066.1|Helicoverpa zea  
KM275065.1|Helicoverpa zea  
KM275064.1|Helicoverpa zea  
KM275063.1|Helicoverpa zea  
KM275062.1|Helicoverpa zea  
KM275061.1|Helicoverpa zea  
KM275060.1|Helicoverpa zea  
KM275056.1|Helicoverpa zea  
KM275055.1|Helicoverpa zea  
KM275054.1|Helicoverpa zea  
KM275053.1|Helicoverpa zea  
KM275036.1|Helicoverpa zea  
KM275035.1|Helicoverpa zea  
KM275034.1|Helicoverpa zea  
KM275033.1|Helicoverpa zea  
KM275032.1|Helicoverpa zea  
KM275030.1|Helicoverpa zea  
KM275028.1|Helicoverpa zea  
KM275027.1|Helicoverpa zea  
KM275026.1|Helicoverpa zea  
KM275025.1|Helicoverpa zea  
KM275024.1|Helicoverpa zea  
KM275022.1|Helicoverpa zea  
KM275020.1|Helicoverpa zea  
KM275018.1|Helicoverpa zea  
KM275015.1|Helicoverpa zea  
KM275014.1|Helicoverpa zea  
KM275013.1|Helicoverpa zea  
KM275012.1|Helicoverpa zea  
KM275011.1|Helicoverpa zea  
KM275010.1|Helicoverpa zea  
KM275007.1|Helicoverpa zea  
KJ390233.1|Helicoverpa zea  
KM275009.1|Helicoverpa zea

KM275102.1|Helicoverpa armigera

KP123576.1|*Helicoverpa armigera*  
KP123581.1|*Helicoverpa armigera*  
KF661364.1|*Helicoverpa armigera*  
JX509764.1|*Helicoverpa armigera*  
— GQ995239.1|*Helicoverpa armigera*  
— GQ995240.1|*Helicoverpa armigera*  
— KF624848.1|*Helicoverpa* sp.  
— HQ132369.1|*Helicoverpa armigera*  
— FN907980.1|*Helicoverpa armigera*  
— GQ892845.1|*Helicoverpa armigera*  
— GQ892840.1|*Helicoverpa armigera*  
— GQ892844.1|*Helicoverpa armigera*  
— GQ892851.1|*Helicoverpa armigera*  
— GQ892852.1|*Helicoverpa armigera*  
FN907979.1|*Helicoverpa armigera*  
FN907988.1|*Helicoverpa armigera*  
*Helicoverpa armigera*|ww04874  
KM274973.1|*Helicoverpa armigera*  
KM274970.1|*Helicoverpa armigera*  
KM274965.1|*Helicoverpa armigera*  
KM274961.1|*Helicoverpa armigera*  
KM274953.1|*Helicoverpa armigera*  
KM274950.1|*Helicoverpa armigera*  
KM274949.1|*Helicoverpa armigera*  
KM274946.1|*Helicoverpa armigera*  
KM274943.1|*Helicoverpa armigera*  
KM274945.1|*Helicoverpa armigera*  
KM274938.1|*Helicoverpa armigera*  
KP123585.1|*Helicoverpa armigera*  
KF661386.1|*Helicoverpa armigera*  
KF661385.1|*Helicoverpa armigera*  
KF661367.1|*Helicoverpa armigera*  
KP123586.1|*Helicoverpa armigera*  
— KM274962.1|*Helicoverpa armigera*  
JX509765.1|*Helicoverpa armigera*  
KM275158.1|*Helicoverpa armigera*  
KM275152.1|*Helicoverpa armigera*  
KM275105.1|*Helicoverpa armigera*  
KM275103.1|*Helicoverpa armigera*  
KM275100.1|*Helicoverpa armigera*  
KM275091.1|*Helicoverpa armigera*  
KM275090.1|*Helicoverpa armigera*  
KM275084.1|*Helicoverpa armigera*  
KM275083.1|*Helicoverpa armigera*  
KM275081.1|*Helicoverpa armigera*  
KM275076.1|*Helicoverpa armigera*  
KM275040.1|*Helicoverpa armigera*  
KM274996.1|*Helicoverpa armigera*  
KM274995.1|*Helicoverpa armigera*  
KM274993.1|*Helicoverpa armigera*  
KM274992.1|*Helicoverpa armigera*  
KM274990.1|*Helicoverpa armigera*  
KM274987.1|*Helicoverpa armigera*  
KM274986.1|*Helicoverpa armigera*  
KM274985.1|*Helicoverpa armigera*  
KM274974.1|*Helicoverpa armigera*  
KM274984.1|*Helicoverpa armigera*  
FN907989.1|*Helicoverpa armigera*  
FN907995.1|*Helicoverpa armigera*  
FN908000.1|*Helicoverpa armigera*  
FN908003.1|*Helicoverpa armigera*  
FN908005.1|*Helicoverpa armigera*  
FN908011.1|*Helicoverpa armigera*

KT946050.1|Helicoverpa armigera  
KT946048.1|Helicoverpa armigera  
KT946047.1|Helicoverpa armigera  
KT946046.1|Helicoverpa armigera  
KP253145.1|Helicoverpa armigera  
KF624875.1|Helicoverpa sp.  
KF624874.1|Helicoverpa sp.  
KF624872.1|Helicoverpa sp.  
KF624871.1|Helicoverpa sp.  
KF624870.1|Helicoverpa sp.  
KF624865.1|Helicoverpa sp.  
KF624859.1|Helicoverpa sp.  
KF624857.1|Helicoverpa sp.  
KF624847.1|Helicoverpa sp.  
KF624846.1|Helicoverpa sp.  
KF624841.1|Helicoverpa sp.  
KF624838.1|Helicoverpa sp.  
KF624834.1|Helicoverpa sp.  
KF624833.1|Helicoverpa sp.  
KF624829.1|Helicoverpa sp.  
KF624828.1|Helicoverpa sp.  
KF624825.1|Helicoverpa sp.  
KF624822.1|Helicoverpa sp.  
KF624815.1|Helicoverpa sp.  
JX532104.1|Helicoverpa armigera  
JX156327.1|Helicoverpa armigera  
JX156325.1|Helicoverpa armigera  
HQ951238.1|Helicoverpa armigera|10ANIC-08280  
GU654969.1|Helicoverpa armigera  
GQ995236.1|Helicoverpa armigera  
GQ995235.1|Helicoverpa armigera  
GQ995234.1|Helicoverpa armigera  
GQ995233.1|Helicoverpa armigera  
GQ892855.1|Helicoverpa armigera  
GQ892848.1|Helicoverpa armigera  
GQ892843.1|Helicoverpa armigera  
FN908026.1|Helicoverpa armigera  
FN908018.1|Helicoverpa armigera  
FN908016.1|Helicoverpa armigera  
FN908015.1|Helicoverpa armigera  
FN908013.1|Helicoverpa armigera  
FN908014.1|Helicoverpa armigera  
KT946121.1|Helicoverpa armigera  
KM403206.1|Helicoverpa armigera  
KP210095.1|Helicoverpa armigera  
FN907998.1|Helicoverpa armigera  
KR028338.1|Helicoverpa armigera armigera  
HM854930.1|Helicoverpa armigera  
JX509766.1|Helicoverpa armigera  
JN988529.1|Helicoverpa armigera  
KT946052.1|Helicoverpa armigera  
KT946053.1|Helicoverpa armigera  
KT946056.1|Helicoverpa armigera  
KT946059.1|Helicoverpa armigera  
KT946060.1|Helicoverpa armigera  
KT946115.1|Helicoverpa armigera  
KT946119.1|Helicoverpa armigera  
KT946122.1|Helicoverpa armigera  
KP984524.1|Helicoverpa armigera  
KF624844.1|Helicoverpa sp.  
KT946051.1|Helicoverpa armigera  
KF624851.1|Helicoverpa sp.  
GQ892854.1|Helicoverpa armigera

FN908023.1|*Helicoverpa armigera*  
FN908017.1|*Helicoverpa armigera*  
FN908002.1|*Helicoverpa armigera*  
KM275132.1|*Helicoverpa armigera*  
KM275130.1|*Helicoverpa armigera*  
KM275129.1|*Helicoverpa armigera*  
— KT946039.1|*Helicoverpa armigera*  
— KM274963.1|*Helicoverpa armigera*  
— KM274979.1|*Helicoverpa armigera*  
— KM275074.1|*Helicoverpa armigera*  
— KM275128.1|*Helicoverpa armigera*  
— JX509777.1|*Helicoverpa assulta*  
— KM275139.1|*Helicoverpa armigera*  
— KP123578.1|*Helicoverpa armigera*  
— JX509739.1|*Helicoverpa armigera*  
— KM275082.1|*Helicoverpa armigera*  
— JX392497.1|*Helicoverpa armigera*  
— KM275038.1|*Helicoverpa armigera*  
KF661360.1|*Helicoverpa armigera*  
KP123584.1|*Helicoverpa armigera*  
— KM275077.1|*Helicoverpa armigera*  
— KF661362.1|*Helicoverpa armigera*  
— *Helicoverpa armigera*|ww05394  
— KF661389.1|*Helicoverpa armigera*  
— KF661371.1|*Helicoverpa armigera*  
— KF661361.1|*Helicoverpa armigera*  
— KF661366.1|*Helicoverpa armigera*  
— KF661359.1|*Helicoverpa armigera*  
— KF661363.1|*Helicoverpa armigera*  
— KF661376.1|*Helicoverpa armigera*  
— KF661375.1|*Helicoverpa armigera*  
GQ995241.1|*Helicoverpa armigera*  
— KT946023.1|*Helicoverpa armigera*  
— KT946031.1|*Helicoverpa armigera*  
— KT946034.1|*Helicoverpa armigera*  
— KT946036.1|*Helicoverpa armigera*  
— KT946038.1|*Helicoverpa armigera*  
— KT946028.1|*Helicoverpa armigera*  
— KT946035.1|*Helicoverpa armigera*  
— KT946026.1|*Helicoverpa armigera*  
— KT946040.1|*Helicoverpa armigera*  
— KT946029.1|*Helicoverpa armigera*  
— KT946022.1|*Helicoverpa armigera*  
— KT946037.1|*Helicoverpa armigera*  
— KT946024.1|*Helicoverpa armigera*  
— JX509775.1|*Helicoverpa assulta*  
— KF661352.1|*Helicoverpa armigera*  
— KT946030.1|*Helicoverpa armigera*  
— KT946077.1|*Helicoverpa armigera*  
— KF661383.1|*Helicoverpa armigera*  
— KF661384.1|*Helicoverpa armigera*  
— KF661353.1|*Helicoverpa armigera*  
— *Helicoverpa armigera*|ww04878  
— KF661356.1|*Helicoverpa armigera*  
— KF661357.1|*Helicoverpa armigera*  
— KF661365.1|*Helicoverpa armigera*  
— KF661368.1|*Helicoverpa armigera*  
— KF661369.1|*Helicoverpa armigera*  
— KF661370.1|*Helicoverpa armigera*  
— KF661373.1|*Helicoverpa armigera*  
— KF661374.1|*Helicoverpa armigera*  
— KF661377.1|*Helicoverpa armigera*  
— KF661378.1|*Helicoverpa armigera*



KF661379.1|*Helicoverpa armigera*  
KF661380.1|*Helicoverpa armigera*  
KF661381.1|*Helicoverpa armigera*  
KF661388.1|*Helicoverpa armigera*  
EU768936.1|*Helicoverpa armigera conferta*  
JQ240198.1|*Helicoverpa punctigera*  
HQ951239.1|*Helicoverpa armigera*|10ANIC-08281  
KT946061.1|*Helicoverpa armigera*  
KT946062.1|*Helicoverpa armigera*  
KT946063.1|*Helicoverpa armigera*  
KT946064.1|*Helicoverpa armigera*  
KT946065.1|*Helicoverpa armigera*  
KT946066.1|*Helicoverpa armigera*  
KT946067.1|*Helicoverpa armigera*  
KT946068.1|*Helicoverpa armigera*  
KT946069.1|*Helicoverpa armigera*  
KT946076.1|*Helicoverpa armigera*  
KT946075.1|*Helicoverpa armigera*  
KT946074.1|*Helicoverpa armigera*  
KT946073.1|*Helicoverpa armigera*  
KT946072.1|*Helicoverpa armigera*  
KT946070.1|*Helicoverpa armigera*  
KT946071.1|*Helicoverpa armigera*  
KT946116.1|*Helicoverpa armigera*  
KF624868.1|*Helicoverpa* sp.  
KF624814.1|*Helicoverpa* sp.  
KP123580.1|*Helicoverpa armigera*  
KF624813.1|*Helicoverpa* sp.  
JX156326.1|*Helicoverpa armigera*  
HM854932.1|*Helicoverpa armigera*  
HM854928.1|*Helicoverpa armigera*  
GU686955.1|*Helicoverpa armigera*  
GQ995238.1|*Helicoverpa armigera*  
GQ995237.1|*Helicoverpa armigera*  
GQ892842.1|*Helicoverpa armigera*  
FN907999.1|*Helicoverpa armigera*  
KM275112.1|*Helicoverpa armigera*  
KM275079.1|*Helicoverpa armigera*  
KM275071.1|*Helicoverpa armigera*  
KM274971.1|*Helicoverpa armigera*  
KM275044.1|*Helicoverpa armigera*  
KP123574.1|*Helicoverpa armigera*  
HM854929.1|*Helicoverpa armigera*  
KT946078.1|*Helicoverpa armigera*  
KT946080.1|*Helicoverpa armigera*  
KT946079.1|*Helicoverpa armigera*  
KF661355.1|*Helicoverpa armigera*  
KP123579.1|*Helicoverpa armigera*  
KP123575.1|*Helicoverpa armigera*  
GQ892849.1|*Helicoverpa armigera*  
GQ995244.1|*Helicoverpa armigera*  
KM275041.1|*Helicoverpa armigera*  
KF153748.1|*Helicoverpa armigera*  
KM275131.1|*Helicoverpa armigera*  
KM275135.1|*Helicoverpa armigera*  
KM275153.1|*Helicoverpa armigera*  
KM274982.1|*Helicoverpa armigera*  
KP123573.1|*Helicoverpa armigera*  
KM275151.1|*Helicoverpa armigera*  
KF661358.1|*Helicoverpa armigera*  
KM275045.1|*Helicoverpa armigera*  
KP123582.1|*Helicoverpa armigera*  
KF022224.1|*Helicoverpa armigera*

KR022224.1|*Helicoverpa armigera*  
KM275042.1|*Helicoverpa armigera*  
KP984522.1|*Helicoverpa armigera*  
KR183528.1|*Helicoverpa armigera*  
KP123583.1|*Helicoverpa armigera*  
GQ995243.1|*Helicoverpa armigera*  
JN988530.1|*Helicoverpa armigera*  
JF776377.1|*Helicoverpa armigera*  
GQ892850.1|*Helicoverpa armigera*  
KM274991.1|*Helicoverpa armigera*  
KT946123.1|*Helicoverpa armigera*  
KM275089.1|*Helicoverpa armigera*  
KM275087.1|*Helicoverpa armigera*  
KF624873.1|*Helicoverpa* sp.  
KT946025.1|*Helicoverpa armigera*  
KT946032.1|*Helicoverpa armigera*  
KT946033.1|*Helicoverpa armigera*  
KT946120.1|*Helicoverpa armigera*  
KF624860.1|*Helicoverpa* sp.  
KF624845.1|*Helicoverpa* sp.  
KF624836.1|*Helicoverpa* sp.  
KF624824.1|*Helicoverpa* sp.  
JF415782.1|*Helicoverpa armigera*  
GU686757.1|*Helicoverpa armigera*  
FN908001.1|*Helicoverpa armigera*  
KM275157.1|*Helicoverpa armigera*  
KM275155.1|*Helicoverpa armigera*  
KM275150.1|*Helicoverpa armigera*  
KM275149.1|*Helicoverpa armigera*  
KM275137.1|*Helicoverpa armigera*  
KM275109.1|*Helicoverpa armigera*  
KM275097.1|*Helicoverpa armigera*  
KM275092.1|*Helicoverpa armigera*  
KF153749.1|*Helicoverpa armigera*  
GQ892846.1|*Helicoverpa armigera*  
GQ892853.1|*Helicoverpa armigera*  
KM275085.1|*Helicoverpa armigera*  
KM275080.1|*Helicoverpa armigera*  
KM275072.1|*Helicoverpa armigera*  
KM275050.1|*Helicoverpa armigera*  
KM275049.1|*Helicoverpa armigera*  
KM275048.1|*Helicoverpa armigera*  
KM275047.1|*Helicoverpa armigera*  
KM275043.1|*Helicoverpa armigera*  
KM275039.1|*Helicoverpa armigera*  
KM274957.1|*Helicoverpa armigera*  
KM274983.1|*Helicoverpa armigera*  
KJ183511.1|*Helicoverpa armigera*  
KP123577.1|*Helicoverpa armigera*  
KM274947.1|*Helicoverpa armigera*  
KF661354.1|*Helicoverpa armigera*  
KP984523.1|*Helicoverpa armigera*  
KM274952.1|*Helicoverpa armigera*  
KM274941.1|*Helicoverpa armigera*  
KM274951.1|*Helicoverpa armigera*  
EU768935.1|*Helicoverpa armigera armigera*  
FN907997.1|*Helicoverpa armigera*  
GQ995232.1|*Helicoverpa armigera*  
KF624812.1|*Helicoverpa* sp.  
GQ995242.1|*Helicoverpa armigera*  
GQ892847.1|*Helicoverpa armigera*  
FN907996.1|*Helicoverpa armigera*  
KT946058.1|*Helicoverpa armigera*

— HM854931.1|*Helicoverpa armigera*  
— FN908006.1|*Helicoverpa armigera*  
KF624817.1|*Helicoverpa* sp.  
KF624819.1|*Helicoverpa* sp.  
KF624827.1|*Helicoverpa* sp.  
KT946124.1|*Helicoverpa armigera*  
KT946118.1|*Helicoverpa armigera*  
KT946117.1|*Helicoverpa armigera*  
KT946114.1|*Helicoverpa armigera*  
KT946057.1|*Helicoverpa armigera*  
KT946055.1|*Helicoverpa armigera*  
KT946049.1|*Helicoverpa armigera*  
KF624821.1|*Helicoverpa* sp.  
KF624818.1|*Helicoverpa* sp.  
KF624811.1|*Helicoverpa* sp.  
AB620128.1|*Helicoverpa armigera*  
KM275206.1|*Helicoverpa armigera*  
KM275205.1|*Helicoverpa armigera*  
KM275204.1|*Helicoverpa armigera*  
KF624826.1|*Helicoverpa* sp.  
— KM275203.1|*Helicoverpa armigera*  
KF624816.1|*Helicoverpa* sp.  
— KF624866.1|*Helicoverpa* sp.  
KM275202.1|*Helicoverpa armigera*  
KM275156.1|*Helicoverpa armigera*  
KM275154.1|*Helicoverpa armigera*  
KM275148.1|*Helicoverpa armigera*  
KM275147.1|*Helicoverpa armigera*  
KM275140.1|*Helicoverpa armigera*  
KM275138.1|*Helicoverpa armigera*  
KM275134.1|*Helicoverpa armigera*  
KM275127.1|*Helicoverpa armigera*  
KM275111.1|*Helicoverpa armigera*  
KM275110.1|*Helicoverpa armigera*  
KM275108.1|*Helicoverpa armigera*  
KM275107.1|*Helicoverpa armigera*  
KM275106.1|*Helicoverpa armigera*  
KM275104.1|*Helicoverpa armigera*  
KM275099.1|*Helicoverpa armigera*  
KM275098.1|*Helicoverpa armigera*  
KM275088.1|*Helicoverpa armigera*  
KM275086.1|*Helicoverpa armigera*  
KM275078.1|*Helicoverpa armigera*  
KM275075.1|*Helicoverpa armigera*  
KM275073.1|*Helicoverpa armigera*  
KM275070.1|*Helicoverpa armigera*  
KM275052.1|*Helicoverpa armigera*  
KM275051.1|*Helicoverpa armigera*  
KM275046.1|*Helicoverpa armigera*  
KM274994.1|*Helicoverpa armigera*  
KM274989.1|*Helicoverpa armigera*  
KM274988.1|*Helicoverpa armigera*  
KM274981.1|*Helicoverpa armigera*  
KM274980.1|*Helicoverpa armigera*  
KM274975.1|*Helicoverpa armigera*  
KM274972.1|*Helicoverpa armigera*  
KM274969.1|*Helicoverpa armigera*  
KM274968.1|*Helicoverpa armigera*  
KM274967.1|*Helicoverpa armigera*  
KM274966.1|*Helicoverpa armigera*  
KM274964.1|*Helicoverpa armigera*  
KM274960.1|*Helicoverpa armigera*  
KM274959.1|*Helicoverpa armigera*

KM274958.1|*Helicoverpa armigera*  
— KM274948.1|*Helicoverpa armigera*  
KM274944.1|*Helicoverpa armigera*  
KM274940.1|*Helicoverpa armigera*  
KM274939.1|*Helicoverpa armigera*  
— KM274937.1|*Helicoverpa armigera*  
KM274936.1|*Helicoverpa armigera*  
KF624869.1|*Helicoverpa* sp.  
KF624867.1|*Helicoverpa* sp.  
KF624864.1|*Helicoverpa* sp.  
KF624863.1|*Helicoverpa* sp.  
KF624862.1|*Helicoverpa* sp.  
KF624861.1|*Helicoverpa* sp.  
KF624858.1|*Helicoverpa* sp.  
KF624856.1|*Helicoverpa* sp.  
KF624855.1|*Helicoverpa* sp.  
KF624854.1|*Helicoverpa* sp.  
KF624853.1|*Helicoverpa* sp.  
KF624852.1|*Helicoverpa* sp.  
KF624850.1|*Helicoverpa* sp.  
KF624849.1|*Helicoverpa* sp.  
KF624843.1|*Helicoverpa* sp.  
KF624842.1|*Helicoverpa* sp.  
KF624840.1|*Helicoverpa* sp.  
KF624839.1|*Helicoverpa* sp.  
KF624837.1|*Helicoverpa* sp.  
KF624835.1|*Helicoverpa* sp.  
KF624832.1|*Helicoverpa* sp.  
KF624831.1|*Helicoverpa* sp.  
KF624820.1|*Helicoverpa* sp.  
KF624823.1|*Helicoverpa* sp.  
KF624830.1|*Helicoverpa* sp.  
— KM275101.1|*Helicoverpa armigera*  
— JX509776.1|*Helicoverpa assulta*  
JX392415.1|*Helicoverpa armigera*  
KF661382.1|*Helicoverpa armigera*  
KF661372.1|*Helicoverpa armigera*  
KT946027.1|*Helicoverpa armigera*  
KF661387.1|*Helicoverpa armigera*  
— KM275136.1|*Helicoverpa armigera*  
— KM275133.1|*Helicoverpa armigera*

—  
n.n2
